# Supplementary material for: Thin-shell CdSe/ZnCdS core/shell quantum dots and their electroluminescent device application
Source: Royal Society of Chemistry journal article supplement (doi:10.1039/c8tc03906b), 2018-01-01
Supplement: c8tc03906b1.pdf [file c8tc03906b1.pdf]

## Supporting Information

### **Thin-Shell CdSe/ZnCdS Core/Shell Quantum Dots and Their Electroluminescence Device Application**

Song Wei,<sup>1,2</sup> Yue Liu,<sup>1,2</sup> Mingyue Ma,<sup>1</sup> Yao Wu,<sup>1</sup> Lijian Huang<sup>1</sup> and Daocheng Pan<sup>1,2\*</sup>

*<sup>1</sup>State Key Laboratory of Rare Earth Resource Utilization, Changchun Institute of Applied Chemistry, Chinese Academy of Sciences, 5625 Renmin Street, Changchun, Jilin, 130022, P. R. China; <sup>2</sup>University of Science and Technology of China, Hefei, Anhui 230026, P. R. China*

*Tel & Fax: +86-431-85262941; email: pan@ciac.ac.cn*

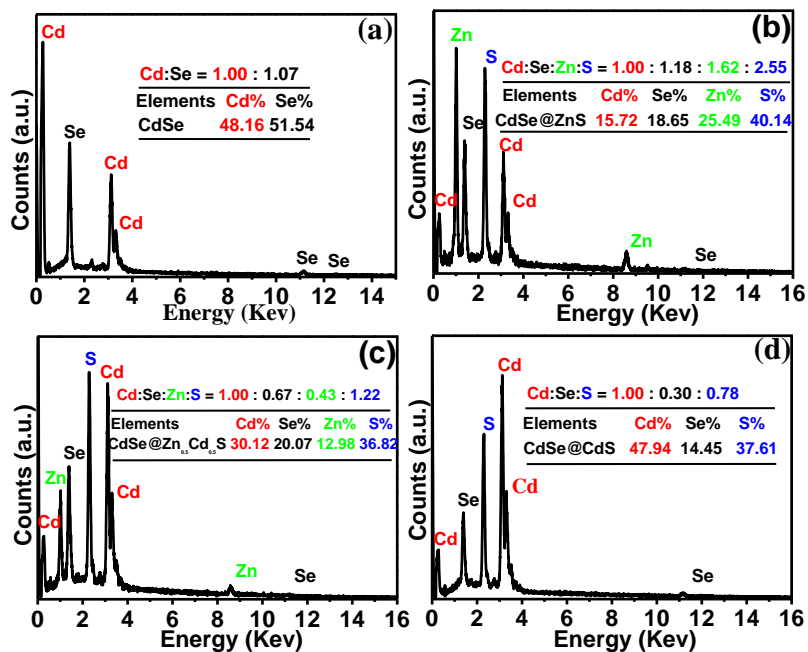

**Figure S1.** EDS spectra and chemical compositions of CdSe cores (a), CdSe/ZnS (b), CdSe/Zn<sub>0.5</sub>Cd<sub>0.5</sub>S (c), and CdSe/CdS core/shell QDs (d).

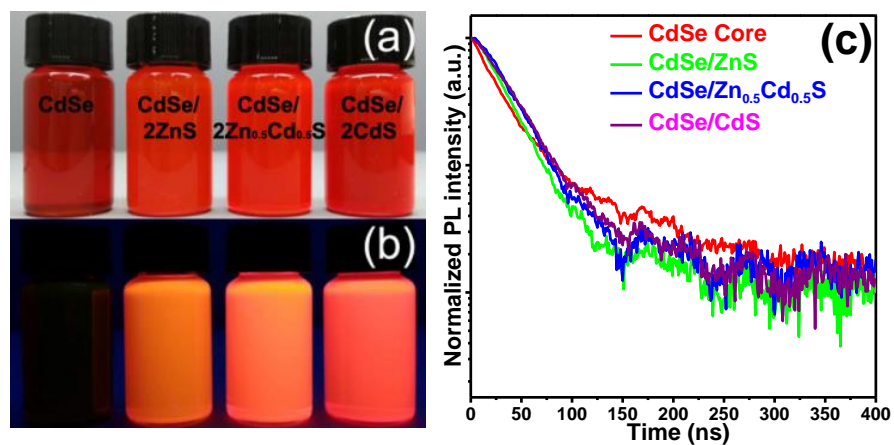

**Figure S2.** Digital photographs of thiol-capped CdSe cores, CdSe/2ZnS, CdSe/2Zn<sub>0.5</sub>Cd<sub>0.5</sub>S, and CdSe/2CdS core/shell QD solutions under normal indoor light (a) and UV light (b) illumination. (c) PL decay curves of CdSe cores, CdSe/2ZnS, CdSe/2Zn<sub>0.5</sub>Cd<sub>0.5</sub>S, and CdSe/2CdS core/shell QDs.

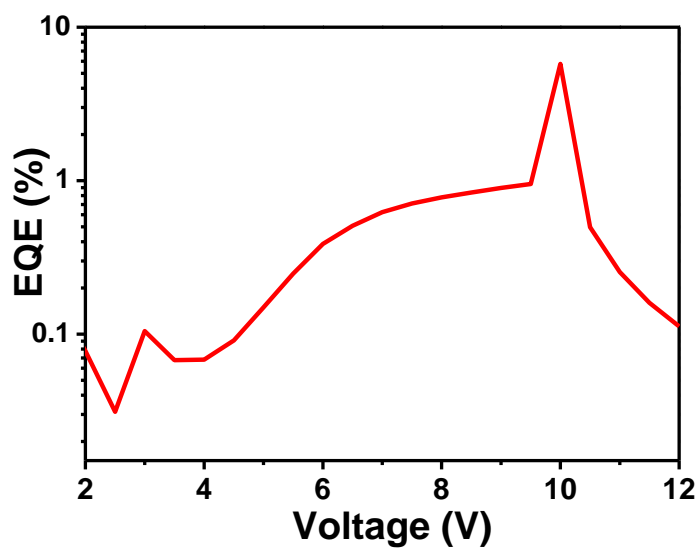

**Figure S3.** External quantum efficiency (EQE) vs driving voltage curve of the CdSe/2Zn<sub>0.5</sub>Cd<sub>0.5</sub>S QDs-based QD-LED.

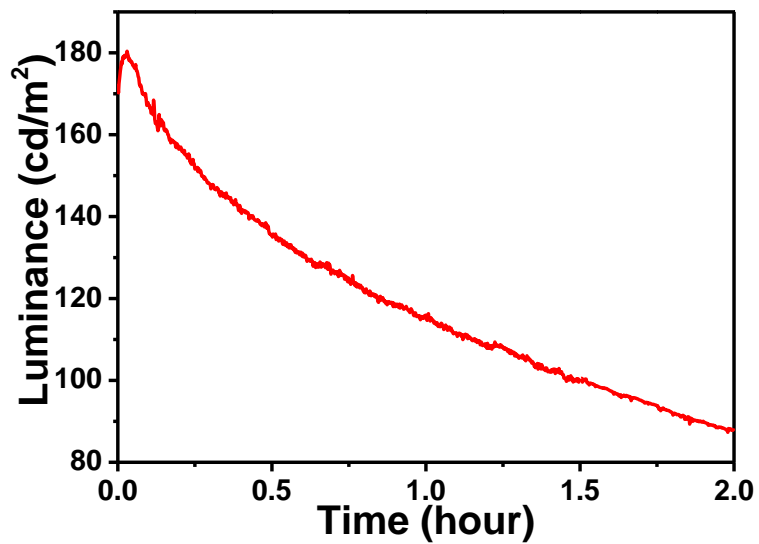

**Figure S4.** The lifetime data of CdSe/2Zn<sub>0.5</sub>Cd<sub>0.5</sub>S QDs-based QD-LED without encapsulation under 65% relative humidity.

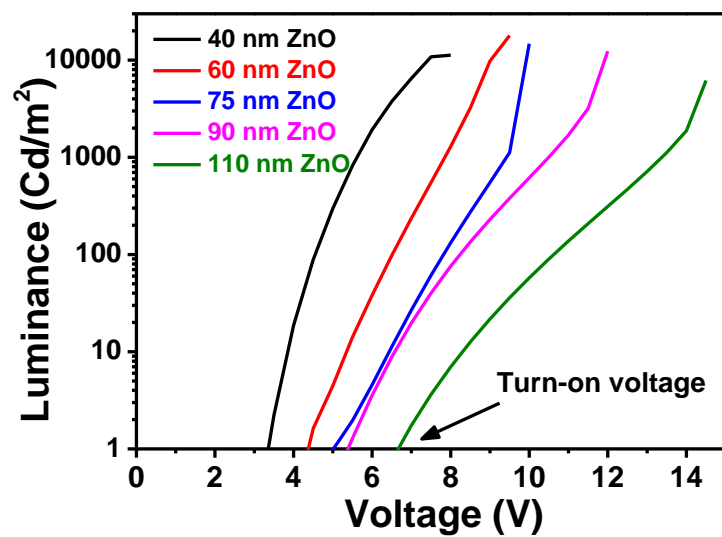

**Figure S5.** Luminance–voltage curves of the CdSe/2Zn<sub>0.5</sub>Cd<sub>0.5</sub>S QDs-based QD-LEDs with different ZnO thicknesses.

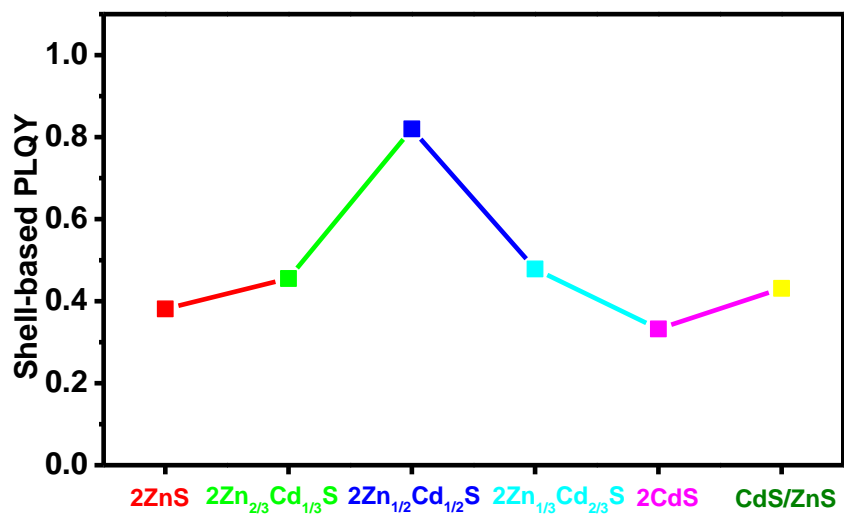

**Figure S6.** PLQYs of CdSe/2ZnS, CdSe/2Zn<sub>2/3</sub>Cd<sub>1/3</sub>S, CdSe/2Zn<sub>1/2</sub>Cd<sub>1/2</sub>S, CdSe/2Zn<sub>1/3</sub>Cd<sub>2/3</sub>S, CdSe/2CdS, and CdSe/1CdS/1ZnS core/shell QDs.
